# Supplementary material for: Establishing a cancer driver gene signature-based risk model for predicting the prognoses of gastric cancer patients
Source: Aging (Albany NY). 2022 Mar 14;14(5):2383–99. doi: 10.18632/aging.203948 (PMC8954960; doi:10.18632/aging.203948)
Supplement: Supplementary Figures [file aging-14-203948-s001.pdf]

SUPPLEMENTARY FIGURES

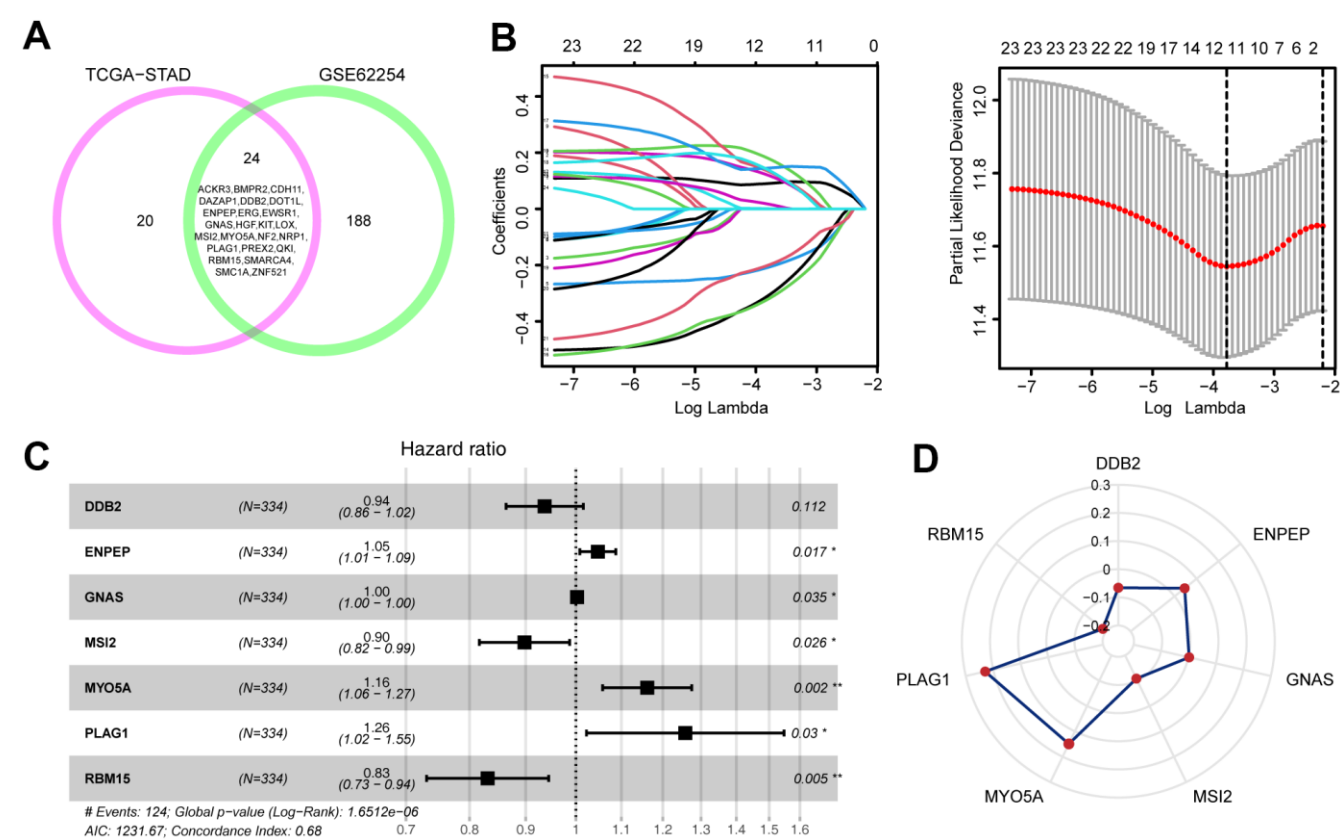

**Supplementary Figure 1. Establishment of a prognostic CDG (cancer driver gene) signature. (A)** Screening of prognosis-related CDGs. **(B)** Least absolute shrinkage and selection operator (LASSO) regression analysis to screen prognosis-related genes from the survival-related CDGs. **(C)** Forest plot of multivariate Cox regression analyses used to construct the prognostic CDG signature. **(D)** Seven-CDG signature for GC based on Cox regression coefficient.

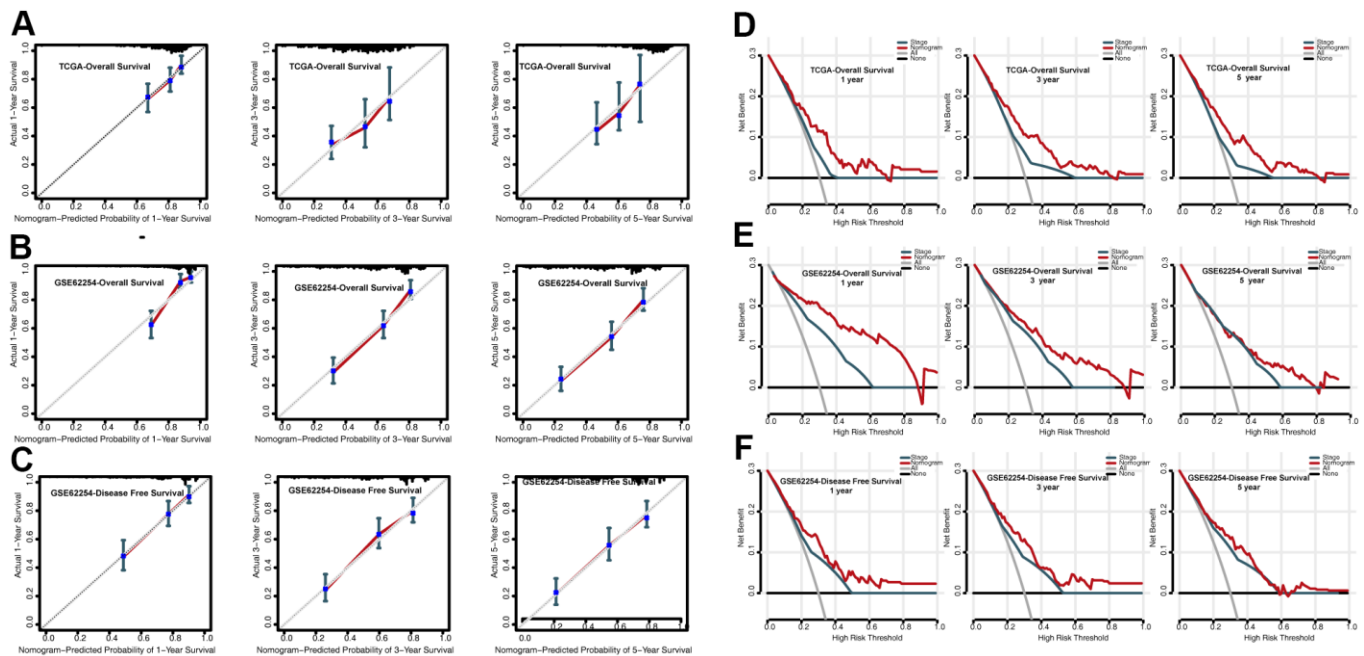

**Supplementary Figure 2. Evaluation of the cancer driver gene (CDG)-based nomogram.** (A) Calibration plot for overall survival (OS) prediction from the training set of the nomogram. (B) Calibration plot for OS prediction from the validation set of the nomogram. (C) Calibration plot for disease-free survival (DFS) prediction from the validation set of the nomogram. (D) Decision curve analysis (DCA) for OS prediction from the training set of the nomogram. (E) DCA for OS prediction from the validation set of the nomogram. (F) DCA for DFS prediction from the validation set of the nomogram.

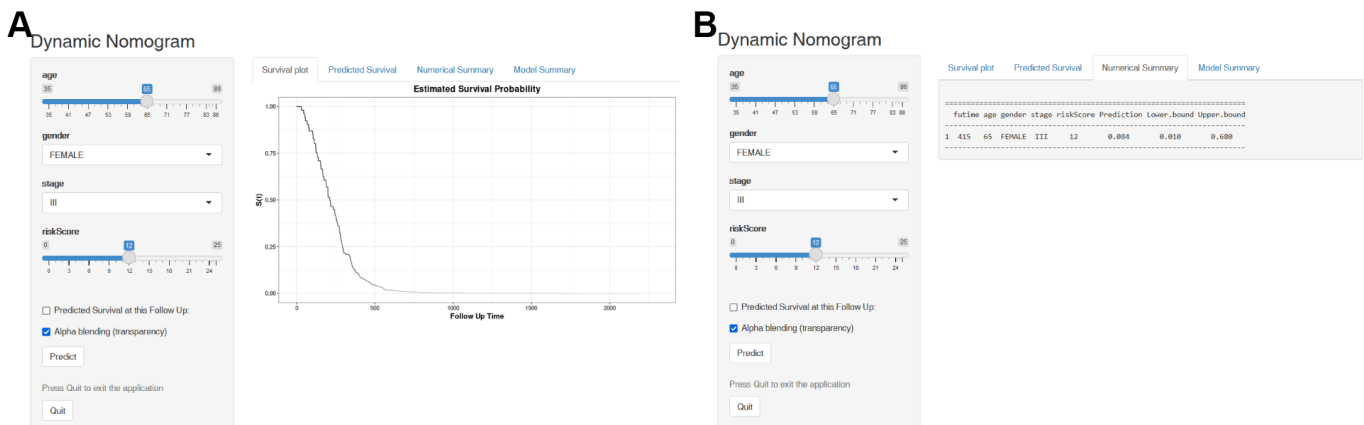

**Supplementary Figure 3. Establishment of an easy-to-operate web-based calculator for predicting gastric cancer (GC) prognoses (<https://prognosis.shinyapps.io/STAD/>).** (A) Overall survival rate calculator. (B) 95% confidence interval of the overall survival rate determined using the web-based calculator.
