# Supplementary material for: Establishing a cancer driver gene signature-based risk model for predicting the prognoses of gastric cancer patients
Source: Aging (Albany NY). 2022 Mar 14;14(5):2383–99. doi: 10.18632/aging.203948 (PMC8954960; doi:10.18632/aging.203948)
Supplement: Supplementary Table 1 [file aging-14-203948-s002.xlsx]

## Sheet: Sheet1
Supplementary Table 1. List of cancer driver genes.
Symbol	Mutations	Samples	Samples (%)	Cohorts
TP53	8504	7695	27.41	165
KRAS	2378	2234	7.96	68
PIK3CA	2453	2157	7.68	87
BRAF	1390	1222	4.35	43
LRP1B	3871	1019	3.63	60
KMT2D	2020	1010	3.6	65
APC	1761	994	3.54	28
ARID1A	1282	954	3.4	70
KMT2C	1887	924	3.29	69
PTEN	1143	904	3.22	61
NRAS	886	777	2.77	37
CTNNB1	989	754	2.69	37
CDKN2A	727	683	2.43	55
IDH1	782	654	2.33	27
RB1	850	566	2.02	52
ATM	1058	525	1.87	44
NF1	1034	486	1.73	42
SMAD4	598	466	1.66	29
FAT1	1396	466	1.66	33
FBXW7	656	433	1.54	33
NOTCH1	813	420	1.5	27
FAT4	2465	415	1.48	33
EGFR	757	383	1.36	14
ARID2	717	341	1.21	29
CREBBP	935	338	1.2	33
KDM6A	571	326	1.16	39
FAT3	2338	322	1.15	20
ATRX	933	297	1.06	21
SETD2	694	277	0.99	25
ERBB2	532	270	0.96	20
NFE2L2	408	264	0.94	15
SMARCA4	748	253	0.9	25
CDH1	455	245	0.87	17
SF3B1	583	242	0.86	23
VHL	279	239	0.85	5
KEAP1	437	236	0.84	10
SPOP	353	231	0.82	14
PBRM1	567	228	0.81	13
EP300	665	225	0.8	20
FOXA1	305	224	0.8	15
PIK3R1	331	218	0.78	14
AR	559	204	0.73	8
MAP3K1	410	193	0.69	12
TRRAP	978	185	0.66	9
ERBB3	532	184	0.66	14
GATA3	284	182	0.65	4
FGFR3	359	178	0.63	12
HRAS	239	173	0.62	20
BRCA2	699	165	0.59	15
BAP1	361	164	0.58	19
STAG2	460	155	0.55	17
DDX3X	373	152	0.54	19
CDH10	967	138	0.49	4
AKT1	244	134	0.48	17
STK11	264	130	0.46	7
PIM1	428	130	0.46	7
BIRC6	1062	130	0.46	16
MTOR	638	127	0.45	15
ESR1	362	127	0.45	6
BCOR	486	125	0.45	17
NSD1	621	125	0.45	10
NCOR1	606	121	0.43	14
PTCH1	486	121	0.43	11
NOTCH2	636	120	0.43	14
KMT2A	798	120	0.43	13
RNF43	331	118	0.42	17
CTCF	285	115	0.41	9
BTG1	241	113	0.4	8
CASP8	281	113	0.4	11
CDK12	441	112	0.4	13
PREX2	1163	109	0.39	8
KIT	482	104	0.37	10
MAP2K4	219	104	0.37	11
SPEN	840	103	0.37	18
CIC	464	103	0.37	3
PTPN11	261	101	0.36	14
PTPRB	937	100	0.36	3
FAM46C	205	100	0.36	3
HLA-A	333	100	0.36	13
MYD88	162	100	0.36	8
TCF7L2	226	100	0.36	6
AXIN1	321	98	0.35	9
PPP2R1A	279	98	0.35	9
NBEA	1097	96	0.34	9
ZFHX3	1027	96	0.34	10
RBM10	318	95	0.34	11
FGFR2	347	95	0.34	8
FAM135B	1443	94	0.33	6
MYH9	534	88	0.31	8
TBX3	328	85	0.3	8
MAP2K1	189	85	0.3	8
ELF3	203	85	0.3	7
DNMT3A	397	84	0.3	11
AMER1	477	84	0.3	6
PTPRD	1265	84	0.3	10
BCL2	412	83	0.3	4
CDH11	581	82	0.29	8
H3F3A	146	82	0.29	3
PRKCB	411	82	0.29	5
ARID1B	611	81	0.29	12
CHD4	602	81	0.29	6
EZH2	241	79	0.28	11
ALK	607	79	0.28	10
CDKN1A	109	79	0.28	10
IDH2	178	78	0.28	8
CARD11	700	78	0.28	9
RHOA	184	77	0.27	10
GNAS	570	76	0.27	14
MECOM	486	75	0.27	7
MED12	663	74	0.26	11
ERCC2	243	74	0.26	6
ACVR2A	256	70	0.25	11
TGFBR2	270	70	0.25	10
SOX9	199	69	0.25	3
RUNX1	207	69	0.25	5
PPP6C	148	69	0.25	5
U2AF1	158	63	0.22	11
TSC1	304	63	0.22	6
GTF2I	188	62	0.22	2
EPHA3	781	61	0.22	6
MAX	120	60	0.21	8
IRF4	253	60	0.21	7
KDR	677	60	0.21	8
SGK1	370	59	0.21	5
ASXL1	441	59	0.21	14
RGPD3	361	59	0.21	2
POLQ	629	56	0.2	6
PRDM1	383	56	0.2	5
CCND1	158	55	0.2	2
CUX1	438	55	0.2	7
TSC2	469	54	0.19	11
NF2	201	54	0.19	11
CBFB	101	53	0.19	6
ALB	324	52	0.19	2
MYCN	191	51	0.18	8
PABPC1	245	51	0.18	5
SMO	228	50	0.18	9
CUL3	239	50	0.18	6
P2RY8	208	50	0.18	6
CYLD	263	50	0.18	5
CDKN1B	152	49	0.17	10
GNA11	129	48	0.17	3
FLT3	415	48	0.17	7
RAC1	108	48	0.17	4
MYH11	697	48	0.17	7
MGA	700	47	0.17	2
GNAQ	144	47	0.17	2
TNFRSF14	110	46	0.16	5
HLA-B	347	45	0.16	6
BRCA1	417	45	0.16	4
SOCS1	168	45	0.16	5
RET	420	42	0.15	5
SRGAP3	313	42	0.15	2
FLT4	512	41	0.15	8
RASA1	338	40	0.14	2
MEN1	208	40	0.14	6
RXRA	168	40	0.14	3
B2M	126	40	0.14	8
FUBP1	220	39	0.14	3
HSPG2	1016	39	0.14	3
LZTR1	260	38	0.14	5
PCBP1	137	38	0.14	4
KLF5	158	38	0.14	3
CACNA1D	625	37	0.13	6
SMAD3	152	37	0.13	5
CD79B	138	37	0.13	4
PRKD2	276	37	0.13	1
SMAD2	160	36	0.13	4
RGS7	469	36	0.13	3
MEF2B	132	36	0.13	4
BCLAF1	604	36	0.13	3
LATS1	311	36	0.13	5
MYC	339	36	0.13	4
RPS6KA3	209	36	0.13	4
STAT3	244	35	0.12	5
ERBB4	976	35	0.12	3
NFKBIE	125	34	0.12	6
BCL9L	378	34	0.12	3
CHD2	409	34	0.12	6
ACVR1	145	33	0.12	2
BCL9	360	32	0.11	3
EBF1	384	32	0.11	5
MET	437	32	0.11	3
SP140	411	32	0.11	1
XPO1	237	32	0.11	8
UBR5	645	32	0.11	4
TET2	407	32	0.11	7
FN1	710	31	0.11	1
PTPRT	1225	31	0.11	4
TET1	530	31	0.11	6
KDM5C	317	31	0.11	5
MB21D2	183	31	0.11	3
NCOR2	640	31	0.11	7
IKZF1	353	31	0.11	4
FANCD2	331	30	0.11	2
CMTR2	168	30	0.11	2
USP6	409	30	0.11	6
HIST1H3B	183	30	0.11	3
PIK3CB	299	29	0.1	5
EIF1AX	99	29	0.1	5
ARHGAP35	498	29	0.1	2
FGFR1	260	29	0.1	8
TBL1XR1	217	29	0.1	3
TP63	438	28	0.1	4
RUNX1T1	566	28	0.1	6
ZNF521	750	27	0.1	5
ZFP36L1	193	27	0.1	1
PTPRC	671	27	0.1	3
ATF7IP	340	27	0.1	2
MAPK1	99	26	0.09	4
RANBP2	611	26	0.09	6
BCR	327	26	0.09	6
FAM186A	363	26	0.09	2
POT1	288	26	0.09	7
NFKB2	176	26	0.09	2
PARP4	388	26	0.09	2
COL1A1	492	25	0.09	5
PDGFRA	497	25	0.09	7
AJUBA	125	25	0.09	1
NIPBL	630	25	0.09	2
CCND3	89	25	0.09	4
NIN	418	25	0.09	4
BRD7	176	25	0.09	3
BCL6	233	25	0.09	3
FOXA2	189	25	0.09	2
ABL2	280	25	0.09	4
DROSHA	361	25	0.09	2
RNF213	974	25	0.09	7
JAK1	308	24	0.09	3
GRIN2A	1123	24	0.09	4
RPL10	101	24	0.09	2
GNA13	193	24	0.09	2
ARHGAP5	317	23	0.08	4
MSN	219	23	0.08	3
CR1	627	23	0.08	2
BCL7A	104	23	0.08	2
BTK	249	23	0.08	2
NUP214	396	22	0.08	3
ASXL2	250	22	0.08	2
MAML2	297	22	0.08	2
DICER1	382	22	0.08	2
BCL2L12	113	22	0.08	1
SOX17	218	21	0.07	1
KDM5A	344	21	0.07	1
ARHGEF10	339	21	0.07	4
ZNF626	301	21	0.07	1
CNOT9	89	21	0.07	2
STAT6	180	20	0.07	3
SRSF2	98	20	0.07	2
NFKBIA	120	19	0.07	2
EPAS1	231	19	0.07	3
FAM174B	53	19	0.07	3
GATA2	182	19	0.07	4
PTPN14	402	19	0.07	1
ZBTB20	335	19	0.07	1
SIRPA	227	19	0.07	5
NEFH	284	18	0.06	1
EPHA7	644	18	0.06	3
DAXX	204	18	0.06	3
PRF1	205	18	0.06	2
RAF1	166	17	0.06	2
PPM1D	142	17	0.06	3
ZFX	153	17	0.06	1
FBXO11	214	17	0.06	2
POU2F2	187	17	0.06	3
PTPRK	508	17	0.06	2
SETDB1	331	16	0.06	3
RAD21	179	16	0.06	3
CRNKL1	210	16	0.06	1
PRKAR1A	118	16	0.06	4
ZNF208	989	16	0.06	1
BCORL1	513	16	0.06	6
DCSTAMP	326	15	0.05	1
POLE	552	15	0.05	3
ZEB1	429	15	0.05	2
PSIP1	120	15	0.05	1
PRKCD	172	15	0.05	2
KAT6A	456	15	0.05	3
SOS1	266	15	0.05	1
TRIM49C	156	15	0.05	1
ZNF721	290	15	0.05	1
SETD1B	323	15	0.05	3
SETBP1	647	14	0.05	4
IL7R	345	14	0.05	3
ZNF93	234	14	0.05	1
JAK2	252	14	0.05	4
LATS2	303	14	0.05	3
USP8	210	14	0.05	3
NCOA2	347	14	0.05	2
ABCB1	662	14	0.05	1
PLCG1	264	13	0.05	4
ZNF680	167	13	0.05	1
CNOT3	202	13	0.05	3
DCAF12L2	436	13	0.05	2
IRAK1	166	13	0.05	1
CYP2C8	247	13	0.05	2
BMPR1A	108	13	0.05	2
ABL1	277	13	0.05	2
ETV6	183	13	0.05	3
MAP2K7	175	13	0.05	1
NCOA1	315	13	0.05	1
EFTUD2	231	13	0.05	1
DCC	1118	13	0.05	2
FBN2	1201	13	0.05	2
HNF1A	236	13	0.05	2
IRF1	97	12	0.04	1
PDGFRB	333	12	0.04	2
RPS3A	63	12	0.04	1
WNK2	535	12	0.04	3
TGIF1	99	12	0.04	1
ZBTB16	252	12	0.04	3
TNC	636	12	0.04	4
BCL11B	339	12	0.04	4
CASZ1	424	12	0.04	1
SOHLH2	186	12	0.04	1
NSD2	309	12	0.04	1
LDB1	115	12	0.04	3
PTPN13	513	12	0.04	1
IKBKB	206	12	0.04	1
SALL4	424	11	0.04	3
EIF3E	157	11	0.04	2
RHPN2	230	11	0.04	3
NONO	148	11	0.04	2
DUSP16	145	11	0.04	2
ETV5	184	11	0.04	2
SMARCB1	132	11	0.04	4
FAS	91	11	0.04	2
NTRK3	560	11	0.04	2
ARHGEF10L	294	11	0.04	3
DHX9	251	11	0.04	1
FOXO1	183	11	0.04	2
FOXP1	207	11	0.04	3
CLTC	308	11	0.04	3
CDK4	63	10	0.04	1
LRIG3	300	10	0.04	3
SUZ12	150	10	0.04	3
EPHA2	324	10	0.04	2
DIS3	309	10	0.04	1
AFF3	541	10	0.04	1
ERG	238	10	0.04	2
CLIP1	310	10	0.04	4
DTX1	340	9	0.03	1
NPM1	65	9	0.03	1
FOXD4L1	96	9	0.03	1
SMC1A	278	9	0.03	2
PHF6	99	9	0.03	2
KLHL6	333	9	0.03	1
DGCR8	169	9	0.03	3
ZNF429	243	9	0.03	2
CD58	91	9	0.03	2
KLF4	104	9	0.03	4
ING1	136	9	0.03	1
TCF4	290	9	0.03	2
PTPN6	143	9	0.03	3
TNFAIP3	214	9	0.03	2
TLL1	637	8	0.03	1
PRDM2	383	8	0.03	3
EGR2	152	8	0.03	1
HOXC13	105	8	0.03	1
RBM39	120	8	0.03	1
CCND2	127	8	0.03	2
HERC2	1269	8	0.03	1
AKT3	160	8	0.03	2
FLCN	143	8	0.03	1
KDM3B	445	8	0.03	2
FOXL2	87	8	0.03	1
PTMA	55	8	0.03	1
KEL	424	8	0.03	1
ELN	276	8	0.03	1
PCMTD1	185	8	0.03	1
RRAGC	62	8	0.03	1
ZXDB	192	8	0.03	1
KMT2B	769	8	0.03	2
CLTCL1	354	8	0.03	1
NTRK1	335	8	0.03	1
NXF1	184	8	0.03	2
CPEB3	125	8	0.03	1
TFAP4	105	7	0.02	2
RRAS2	67	7	0.02	1
BIRC3	153	7	0.02	1
STRN	180	7	0.02	1
TCIRG1	157	7	0.02	1
KAT6B	412	7	0.02	3
GNAI2	104	7	0.02	1
NPEPPS	194	7	0.02	2
ATR	602	7	0.02	2
CDC73	171	7	0.02	1
BCL10	77	7	0.02	2
BMPR2	222	7	0.02	1
PPP3CA	142	7	0.02	1
ARHGEF12	320	7	0.02	2
SEPT9	150	7	0.02	1
LPAR4	217	7	0.02	1
ELL	152	6	0.02	3
BRD4	292	6	0.02	2
CBL	205	6	0.02	2
ARAF	173	6	0.02	2
EML4	183	6	0.02	2
WT1	229	6	0.02	2
HNRNPA2B1	139	6	0.02	1
SUSD2	207	6	0.02	1
PPT2	67	6	0.02	1
INO80	311	6	0.02	1
FH	130	6	0.02	1
IFNGR1	102	6	0.02	1
HOXD13	126	6	0.02	2
TOP2A	271	6	0.02	1
RBFOX2	77	6	0.02	1
CEBPA	43	6	0.02	2
PRR14	131	6	0.02	1
KLHL36	147	6	0.02	1
CIITA	372	6	0.02	2
NKTR	210	5	0.02	1
PRRX1	144	5	0.02	1
SIX1	82	5	0.02	1
CDKN2C	53	5	0.02	2
EHD2	153	5	0.02	1
IFNAR1	89	5	0.02	1
ERCC3	166	5	0.02	1
FGFR4	260	5	0.02	2
KIF5B	166	5	0.02	1
AXIN2	223	5	0.02	1
PAK2	182	5	0.02	1
HIP1	270	5	0.02	2
RAP1GDS1	138	5	0.02	2
ZNF148	167	5	0.02	1
SMARCA1	293	5	0.02	1
PCDH17	936	5	0.02	1
NFATC2	406	5	0.02	2
MYO5A	389	5	0.02	2
RELA	123	5	0.02	1
ZBTB7B	180	5	0.02	1
FHIT	73	5	0.02	2
NT5C3A	81	5	0.02	1
NRK	703	4	0.01	1
USP44	155	4	0.01	2
RIPK1	119	4	0.01	1
FAT2	1224	4	0.01	1
CCDC6	108	4	0.01	1
LIFR	380	4	0.01	1
ENPEP	445	4	0.01	1
ZCRB1	43	4	0.01	1
TRIP11	373	4	0.01	1
ACKR3	150	4	0.01	1
RASA2	188	4	0.01	1
NRG1	361	4	0.01	1
PDPR	230	4	0.01	1
STAT5B	177	4	0.01	1
U2AF2	128	4	0.01	1
HSP90AA1	174	4	0.01	2
MALT1	146	4	0.01	1
NKX2-1	110	4	0.01	1
RBM38	65	4	0.01	1
TRIM33	204	4	0.01	2
TOP1	146	4	0.01	1
QKI	121	4	0.01	1
MDM4	99	4	0.01	1
IRS4	460	4	0.01	2
SDC4	47	4	0.01	1
CSF3R	227	4	0.01	1
GATA1	126	4	0.01	1
MLLT3	148	4	0.01	1
CDX2	85	4	0.01	1
RNF6	137	4	0.01	1
CHEK2	157	4	0.01	1
RGL3	196	4	0.01	1
MCM3AP	403	4	0.01	1
PDCD1LG2	64	4	0.01	1
RBFOX1	426	4	0.01	1
ZNF780A	203	4	0.01	1
JAK3	342	4	0.01	1
GMPS	142	4	0.01	1
ZNRF3	203	4	0.01	1
TRAF3	239	4	0.01	1
VAV1	346	4	0.01	1
LPP	214	4	0.01	2
HGF	504	3	0.01	1
LOX	97	3	0.01	1
DAZAP1	146	3	0.01	1
RPL22	110	3	0.01	1
WNK4	303	3	0.01	1
RARA	133	3	0.01	1
HTRA2	109	3	0.01	1
NRP1	254	3	0.01	1
PMS2	200	3	0.01	1
CYSLTR2	127	3	0.01	1
MSI2	91	3	0.01	1
XPC	155	3	0.01	1
CAMTA1	609	3	0.01	1
ZRSR2	78	3	0.01	1
ELF4	187	3	0.01	1
UGT2B17	186	3	0.01	1
PEG3	1240	3	0.01	1
FANCF	75	3	0.01	1
FBLN1	192	3	0.01	1
CRTC1	135	3	0.01	1
TRIM24	237	3	0.01	1
IKZF3	215	3	0.01	1
ATG7	160	3	0.01	1
WDR45	119	3	0.01	1
ACSL3	132	3	0.01	1
MAP2	776	3	0.01	1
RALGDS	152	3	0.01	1
SIN3A	344	3	0.01	1
SFMBT2	457	3	0.01	1
DOT1L	379	3	0.01	1
MARK2	210	3	0.01	1
RSPH10B2	95	3	0.01	1
SATB1	253	3	0.01	1
KIFC1	171	3	0.01	1
LTB	186	3	0.01	1
LY75-CD302	428	3	0.01	1
ADGRB1	532	3	0.01	1
POLD1	290	3	0.01	1
BCL11A	384	3	0.01	1
HOXA11	86	2	0.01	1
GLI1	346	2	0.01	1
NPRL2	71	2	0.01	1
TFG	68	2	0.01	1
CCR7	93	2	0.01	1
MLLT1	111	2	0.01	1
DNAJB1	73	2	0.01	1
DDB2	77	2	0.01	1
MDM2	107	2	0.01	1
PML	236	2	0.01	1
CBFA2T3	165	2	0.01	1
FGD5	471	2	0.01	1
FANCC	96	2	0.01	1
WRN	292	2	0.01	1
PLAG1	192	2	0.01	1
ETV4	87	2	0.01	1
USP9X	527	2	0.01	1
MAF	116	2	0.01	1
SH2B3	119	2	0.01	1
SLC45A3	164	2	0.01	1
PDE4DIP	998	2	0.01	1
MTCP1	34	2	0.01	1
RBM15	204	2	0.01	1
HSP90AB1	171	2	0.01	1
UBE2A	62	2	0.01	1
EPS15	199	2	0.01	1
STIL	245	2	0.01	1
SET	55	2	0.01	1
ID3	65	2	0.01	1
ABI1	105	2	0.01	1
WAS	155	2	0.01	1
SOX21	53	2	0.01	1
ZNF165	136	2	0.01	1
PLCB4	622	2	0.01	1
CARS	183	2	0.01	1
IL6ST	199	2	0.01	1
TEC	176	2	0.01	1
FANCA	309	2	0.01	1
NUMA1	428	2	0.01	1
SMARCD1	88	2	0.01	1
AFF1	286	2	0.01	1
EXT2	164	2	0.01	1
UBE2D2	40	2	0.01	1
ESRRA	119	2	0.01	1
FOXO3	136	2	0.01	1
CXCR4	140	2	0.01	1
EWSR1	193	2	0.01	1
ZNF814	213	2	0.01	1
RABEP1	149	2	0.01	1
TAF15	131	2	0.01	1
HIST1H4I	73	2	0.01	1
RECQL4	277	2	0.01	1
DDX6	92	2	0.01	1
